# Supplementary material for: Crystal structure of an inorganic pyrophosphatase from Chlamydia trachomatis D/UW-3/Cx
Source: PubMed Central journal article supplement (PMC8900733; doi:10.1107/s2053230x22002138), 2022-02-28
Supplement: f-78-00135-sup1.pdf [file f-78-00135-sup1.pdf]

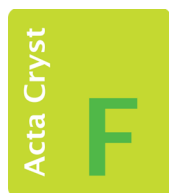

STRUCTURAL BIOLOGY  
COMMUNICATIONS

**Volume 78 (2022)**

**Supporting information for article:**

**Crystal structure of an inorganic pyrophosphatase from *Chlamydia trachomatis* D/UW-3/Cx**

**Jasmine Maddy, Bart L. Staker, Sandhya Subramanian, Jan Abendroth,  
Thomas E. Edwards, Peter J. Myler, Kevin Hybiske and Oluwatoyin A. Asojo**

**Figure S1** DALI analysis of *CtPPase* (<http://ekhidna2.biocenter.helsinki.fi/dali/>) (Holm, 2020)

**Table S1** Results from *PDBeFold P* (<http://www.ebi.ac.uk/msd-srv/ssm/>) analysis of *CtPPase* (Krissinel & Henrick, 2004)

### **References**

Holm, L. (2020). *Protein Sci* **29**, 128-140.

Krissinel, E. & Henrick, K. (2004). *Acta crystallographica. Section D, Biological crystallography* **60**, 2256-2268.



## RESULT SUMMARY

| ## | Q-score | P-score | Z-score | RMSD  | Nalgn | Nsse | Ngaps | Seq-%  | Nmd | Nres-Q | Nsse-Q | Nres-T | Nsse-T | Query      | Target     |
|----|---------|---------|---------|-------|-------|------|-------|--------|-----|--------|--------|--------|--------|------------|------------|
| 1  | 1       | 41.41   | 19.31   | 0.000 | 206   | 10   | 0     | 1      | 0   | 206    | 10     | 206    | 10     | PDB 6we5:A | PDB 6we5:A |
| 2  | 0.9867  | 29.22   | 16.16   | 0.349 | 206   | 10   | 0     | 1      | 0   | 206    | 10     | 206    | 10     | PDB 6we5:A | PDB 6we5:B |
| 3  | 0.9789  | 25.05   | 14.94   | 0.325 | 205   | 10   | 0     | 1      | 0   | 206    | 10     | 206    | 10     | PDB 6we5:A | PDB 6we5:C |
| 4  | 0.6942  | 13.32   | 11.12   | 1.179 | 169   | 7    | 4     | 0.3669 | 0   | 206    | 10     | 173    | 9      | PDB 6we5:A | PDB 5ty5:F |
| 5  | 0.6902  | 12.96   | 10.98   | 1.179 | 169   | 7    | 4     | 0.3669 | 0   | 206    | 10     | 174    | 9      | PDB 6we5:A | PDB 5ty5:D |
| 6  | 0.6801  | 12.08   | 10.49   | 1.192 | 168   | 7    | 6     | 0.369  | 0   | 206    | 10     | 174    | 9      | PDB 6we5:A | PDB 3r5v:F |
| 7  | 0.6795  | 12.73   | 10.77   | 1.196 | 168   | 7    | 6     | 0.369  | 0   | 206    | 10     | 174    | 9      | PDB 6we5:A | PDB 3r5v:E |
| 8  | 0.6777  | 12.81   | 10.8    | 1.207 | 168   | 7    | 6     | 0.369  | 0   | 206    | 10     | 174    | 9      | PDB 6we5:A | PDB 3r5v:D |
| 9  | 0.6771  | 12.88   | 10.83   | 1.211 | 168   | 7    | 6     | 0.369  | 0   | 206    | 10     | 174    | 9      | PDB 6we5:A | PDB 5ty5:E |
| 10 | 0.6768  | 12.77   | 10.79   | 1.188 | 168   | 7    | 6     | 0.369  | 0   | 206    | 10     | 175    | 9      | PDB 6we5:A | PDB 3q3l:F |
| 11 | 0.6768  | 12.55   | 10.69   | 1.188 | 168   | 7    | 6     | 0.369  | 0   | 206    | 10     | 175    | 9      | PDB 6we5:A | PDB 3i98:F |
| 12 | 0.6748  | 11.93   | 10.43   | 1.227 | 169   | 7    | 5     | 0.3609 | 0   | 206    | 10     | 176    | 9      | PDB 6we5:A | PDB 3q5v:B |
| 13 | 0.6747  | 12.77   | 10.79   | 1.174 | 167   | 7    | 6     | 0.3713 | 0   | 206    | 10     | 174    | 9      | PDB 6we5:A | PDB 3q3l:E |
| 14 | 0.6746  | 12.51   | 10.68   | 1.175 | 167   | 7    | 6     | 0.3713 | 0   | 206    | 10     | 174    | 9      | PDB 6we5:A | PDB 3i98:E |
| 15 | 0.6705  | 12.08   | 10.49   | 1.228 | 168   | 7    | 6     | 0.369  | 0   | 206    | 10     | 175    | 9      | PDB 6we5:A | PDB 3q3l:D |
| 16 | 0.6689  | 11.93   | 10.43   | 1.238 | 168   | 7    | 6     | 0.369  | 0   | 206    | 10     | 175    | 9      | PDB 6we5:A | PDB 3i98:D |
| 17 | 0.6596  | 11.55   | 10.31   | 1.247 | 167   | 7    | 6     | 0.3713 | 0   | 206    | 10     | 175    | 10     | PDB 6we5:A | PDB 3r6e:C |
| 18 | 0.6547  | 12.66   | 10.74   | 1.225 | 165   | 7    | 7     | 0.3697 | 0   | 206    | 10     | 173    | 9      | PDB 6we5:A | PDB 3r6e:D |
| 19 | 0.6493  | 12.11   | 10.55   | 1.361 | 168   | 7    | 5     | 0.3512 | 0   | 206    | 10     | 175    | 10     | PDB 6we5:A | PDB 3r6e:F |
| 20 | 0.6178  | 14.32   | 11.27   | 1.315 | 162   | 8    | 8     | 0.2901 | 0   | 206    | 10     | 173    | 9      | PDB 6we5:A | PDB 6k27:F |
| 21 | 0.6168  | 14.39   | 11.39   | 1.321 | 162   | 8    | 8     | 0.2901 | 0   | 206    | 10     | 173    | 10     | PDB 6we5:A | PDB 6k27:G |
| 22 | 0.6166  | 12.01   | 10.46   | 1.322 | 162   | 7    | 8     | 0.2901 | 0   | 206    | 10     | 173    | 8      | PDB 6we5:A | PDB 6k27:C |
| 23 | 0.6152  | 14.2    | 11.22   | 1.331 | 162   | 8    | 8     | 0.2901 | 0   | 206    | 10     | 173    | 9      | PDB 6we5:A | PDB 6k27:D |
| 24 | 0.6151  | 14.36   | 11.29   | 1.332 | 162   | 8    | 8     | 0.2901 | 0   | 206    | 10     | 173    | 9      | PDB 6we5:A | PDB 6k27:H |
| 25 | 0.6141  | 16.35   | 12.06   | 1.232 | 159   | 8    | 7     | 0.3082 | 0   | 206    | 10     | 171    | 9      | PDB 6we5:A | PDB 6n1c:D |
| 26 | 0.6127  | 14.53   | 11.35   | 1.298 | 161   | 8    | 7     | 0.2919 | 0   | 206    | 10     | 173    | 9      | PDB 6we5:A | PDB 6k27:B |
| 27 | 0.6098  | 14.24   | 11.24   | 1.367 | 162   | 8    | 8     | 0.2901 | 0   | 206    | 10     | 173    | 9      | PDB 6we5:A | PDB 6k27:E |
| 28 | 0.6087  | 14.07   | 11.17   | 1.374 | 162   | 8    | 8     | 0.2901 | 0   | 206    | 10     | 173    | 9      | PDB 6we5:A | PDB 6k27:A |
| 29 | 0.6064  | 13.9    | 11.56   | 1.440 | 164   | 8    | 5     | 0.311  | 0   | 206    | 10     | 175    | 11     | PDB 6we5:A | PDB 5h4f:A |
| 30 | 0.6055  | 11.48   | 10.23   | 1.395 | 162   | 7    | 8     | 0.2901 | 0   | 206    | 10     | 173    | 8      | PDB 6we5:A | PDB 6ki8:B |
| 31 | 0.6053  | 13.75   | 11.04   | 1.396 | 162   | 8    | 8     | 0.284  | 0   | 206    | 10     | 173    | 9      | PDB 6we5:A | PDB 6ki7:B |
| 32 | 0.6052  | 13.95   | 11.12   | 1.397 | 162   | 8    | 8     | 0.284  | 0   | 206    | 10     | 173    | 9      | PDB 6we5:A | PDB 6ki7:C |
| 33 | 0.6016  | 13.43   | 10.91   | 1.467 | 163   | 8    | 7     | 0.2883 | 0   | 206    | 10     | 173    | 9      | PDB 6we5:A | PDB 6k21:A |
| 34 | 0.5991  | 15.98   | 11.92   | 1.230 | 157   | 8    | 8     | 0.3121 | 0   | 206    | 10     | 171    | 9      | PDB 6we5:A | PDB 6n1c:B |
| 35 | 0.598   | 13.77   | 11.5    | 1.463 | 161   | 8    | 7     | 0.354  | 0   | 206    | 10     | 170    | 11     | PDB 6we5:A | PDB 2bqy:A |
| 36 | 0.5972  | 13.66   | 11.15   | 1.235 | 155   | 7    | 7     | 0.3097 | 0   | 206    | 10     | 167    | 8      | PDB 6we5:A | PDB 6n1c:C |
| 37 | 0.5948  | 12.39   | 10.74   | 1.364 | 159   | 7    | 8     | 0.3145 | 0   | 206    | 10     | 171    | 8      | PDB 6we5:A | PDB 6n1c:F |
| 38 | 0.5942  | 12.11   | 10.5    | 1.321 | 159   | 7    | 8     | 0.2956 | 0   | 206    | 10     | 173    | 8      | PDB 6we5:A | PDB 6ki8:C |
| 39 | 0.5938  | 12.86   | 11.14   | 1.492 | 162   | 8    | 6     | 0.2901 | 0   | 206    | 10     | 172    | 11     | PDB 6we5:A | PDB 3sw5:B |
| 40 | 0.5937  | 12.94   | 11.17   | 1.492 | 162   | 8    | 6     | 0.2901 | 0   | 206    | 10     | 172    | 11     | PDB 6we5:A | PDB 3sw5:E |
| 41 | 0.593   | 12.53   | 10.73   | 1.475 | 162   | 8    | 6     | 0.284  | 0   | 206    | 10     | 173    | 9      | PDB 6we5:A | PDB 6ki7:F |
| 42 | 0.593   | 14.25   | 11.69   | 1.402 | 160   | 8    | 6     | 0.3125 | 0   | 206    | 10     | 172    | 11     | PDB 6we5:A | PDB 5h4f:B |
| 43 | 0.5925  | 11.69   | 10.49   | 1.498 | 161   | 8    | 6     | 0.3168 | 0   | 206    | 10     | 170    | 10     | PDB 6we5:A | PDB 3tr4:F |
| 44 | 0.5912  | 14.52   | 11.44   | 1.391 | 160   | 8    | 8     | 0.2875 | 0   | 206    | 10     | 173    | 10     | PDB 6we5:A | PDB 6ki7:A |
| 45 | 0.5902  | 11.89   | 10.25   | 1.446 | 161   | 8    | 9     | 0.2857 | 0   | 206    | 10     | 173    | 10     | PDB 6we5:A | PDB 5tea:E |
| 46 | 0.59    | 11.14   | 10.08   | 1.447 | 161   | 7    | 8     | 0.2857 | 0   | 206    | 10     | 173    | 8      | PDB 6we5:A | PDB 6ki8:A |
| 47 | 0.5898  | 13.21   | 10.91   | 1.401 | 160   | 8    | 8     | 0.2875 | 0   | 206    | 10     | 173    | 10     | PDB 6we5:A | PDB 6ki7:E |
| 48 | 0.5883  | 12.94   | 11.17   | 1.380 | 158   | 8    | 9     | 0.3101 | 0   | 206    | 10     | 170    | 11     | PDB 6we5:A | PDB 3i4q:A |
| 49 | 0.5875  | 13.89   | 11.19   | 1.415 | 160   | 8    | 7     | 0.2875 | 0   | 206    | 10     | 173    | 10     | PDB 6we5:A | PDB 6ki7:G |
| 50 | 0.5874  | 12.3    | 10.64   | 1.417 | 160   | 8    | 8     | 0.2875 | 0   | 206    | 10     | 173    | 9      | PDB 6we5:A | PDB 6ki7:H |

|    |        |       |       |       |     |   |   |        |   |     |    |     |    |            |            |
|----|--------|-------|-------|-------|-----|---|---|--------|---|-----|----|-----|----|------------|------------|
| 51 | 0.583  | 11.34 | 10.5  | 1.458 | 157 | 7 | 6 | 0.3631 | 0 | 206 | 10 | 166 | 10 | PDB 6we5:A | PDB 2bqx:A |
| 52 | 0.5827 | 11.04 | 10.15 | 1.438 | 157 | 7 | 6 | 0.293  | 0 | 206 | 10 | 167 | 8  | PDB 6we5:A | PDB 3d53:E |
| 53 | 0.5826 | 15.93 | 11.9  | 1.303 | 158 | 8 | 9 | 0.3101 | 0 | 206 | 10 | 175 | 9  | PDB 6we5:A | PDB 6n1c:E |
| 54 | 0.5818 | 11.4  | 10.36 | 1.516 | 159 | 8 | 6 | 0.3208 | 0 | 206 | 10 | 168 | 10 | PDB 6we5:A | PDB 3tr4:D |
| 55 | 0.5815 | 11.62 | 10.46 | 1.499 | 160 | 8 | 6 | 0.3187 | 0 | 206 | 10 | 171 | 10 | PDB 6we5:A | PDB 3tr4:E |
| 56 | 0.5812 | 12.43 | 10.75 | 1.196 | 149 | 7 | 5 | 0.3154 | 0 | 206 | 10 | 160 | 8  | PDB 6we5:A | PDB 4z70:C |
| 57 | 0.5805 | 13.28 | 11.15 | 1.379 | 156 | 8 | 8 | 0.2885 | 0 | 206 | 10 | 168 | 10 | PDB 6we5:A | PDB 3emj:C |
| 58 | 0.5763 | 13.66 | 11.15 | 1.272 | 157 | 7 | 9 | 0.3057 | 0 | 206 | 10 | 176 | 8  | PDB 6we5:A | PDB 6n1c:A |
| 59 | 0.5734 | 11.05 | 9.871 | 1.555 | 161 | 7 | 6 | 0.2857 | 0 | 206 | 10 | 173 | 7  | PDB 6we5:A | PDB 6ki7:D |
| 60 | 0.5729 | 11.56 | 10.38 | 1.313 | 150 | 7 | 4 | 0.3133 | 0 | 206 | 10 | 160 | 8  | PDB 6we5:A | PDB 4z71:C |
| 61 | 0.5705 | 11.4  | 10.36 | 1.443 | 155 | 8 | 7 | 0.2903 | 0 | 206 | 10 | 166 | 10 | PDB 6we5:A | PDB 3emj:B |
| 62 | 0.5702 | 11.81 | 10.49 | 1.277 | 149 | 7 | 5 | 0.3154 | 0 | 206 | 10 | 160 | 8  | PDB 6we5:A | PDB 4z74:C |
| 63 | 0.5702 | 12.92 | 11.01 | 1.446 | 155 | 8 | 7 | 0.2903 | 0 | 206 | 10 | 166 | 10 | PDB 6we5:A | PDB 3emj:G |
| 64 | 0.5598 | 11.35 | 10.29 | 1.352 | 149 | 7 | 5 | 0.3154 | 0 | 206 | 10 | 160 | 8  | PDB 6we5:A | PDB 4z73:C |
| 65 | 0.5596 | 11.7  | 10.44 | 1.304 | 149 | 7 | 5 | 0.3154 | 0 | 206 | 10 | 162 | 8  | PDB 6we5:A | PDB 4z70:B |
| 66 | 0.5583 | 11.42 | 10.14 | 1.390 | 155 | 8 | 8 | 0.3613 | 0 | 206 | 10 | 172 | 10 | PDB 6we5:A | PDB 1ygz:F |
| 67 | 0.5577 | 12.71 | 10.7  | 1.393 | 155 | 8 | 8 | 0.3613 | 0 | 206 | 10 | 172 | 10 | PDB 6we5:A | PDB 1ygz:E |
| 68 | 0.5577 | 11.39 | 10.13 | 1.394 | 155 | 8 | 8 | 0.3613 | 0 | 206 | 10 | 172 | 10 | PDB 6we5:A | PDB 1ygz:D |
| 69 | 0.5553 | 11.99 | 10.57 | 1.331 | 148 | 7 | 5 | 0.3041 | 0 | 206 | 10 | 160 | 8  | PDB 6we5:A | PDB 4z73:J |
| 70 | 0.5497 | 9.858 | 9.489 | 1.371 | 148 | 7 | 5 | 0.3108 | 0 | 206 | 10 | 160 | 7  | PDB 6we5:A | PDB 4z73:H |
| 71 | 0.546  | 6.457 | 8.183 | 1.916 | 166 | 8 | 5 | 0.2711 | 0 | 206 | 10 | 174 | 11 | PDB 6we5:A | PDB 3fq3:I |
| 72 | 0.5427 | 10.41 | 9.871 | 1.422 | 148 | 7 | 5 | 0.3108 | 0 | 206 | 10 | 160 | 8  | PDB 6we5:A | PDB 4z74:H |
| 73 | 0.5038 | 6.726 | 8.163 | 1.936 | 159 | 7 | 9 | 0.2704 | 0 | 206 | 10 | 172 | 10 | PDB 6we5:A | PDB 4xe1:A |
